# Supplementary material for: Tumor Treating Fields (TTFields) Concomitant with Immune Checkpoint Inhibitors Are Therapeutically Effective in Non-Small Cell Lung Cancer (NSCLC) In Vivo Model
Source: MDPI journal article supplement (doi:10.3390/ijms232214073), 2022-11-15
Supplement: s1 [file s1]

**Figure S1**

**A**

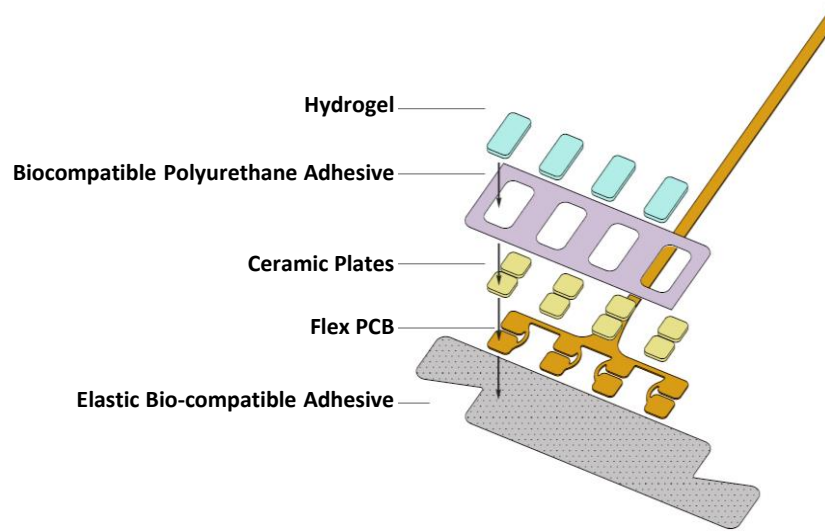

**B**

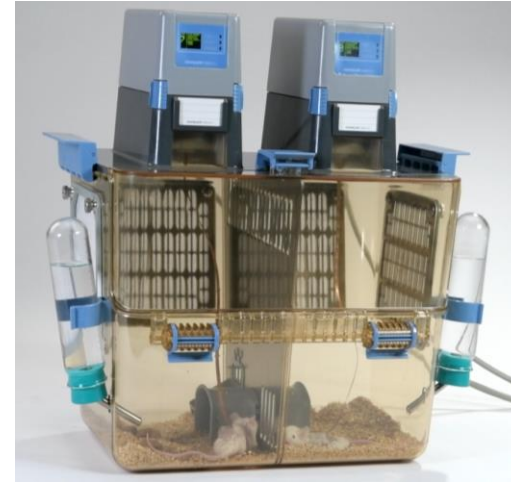

**(A)** Electrode array design. Each array consisted of 2 ceramic disks, and the 4 arrays were compacted into one printed circuit board (PCB) cable. **(B)** Image of a cage used in the study. Cages were designed to house 2 mice separated by bars to prevent cable entanglement, but allow dyadic interactions of the mice.

**Figure S2**

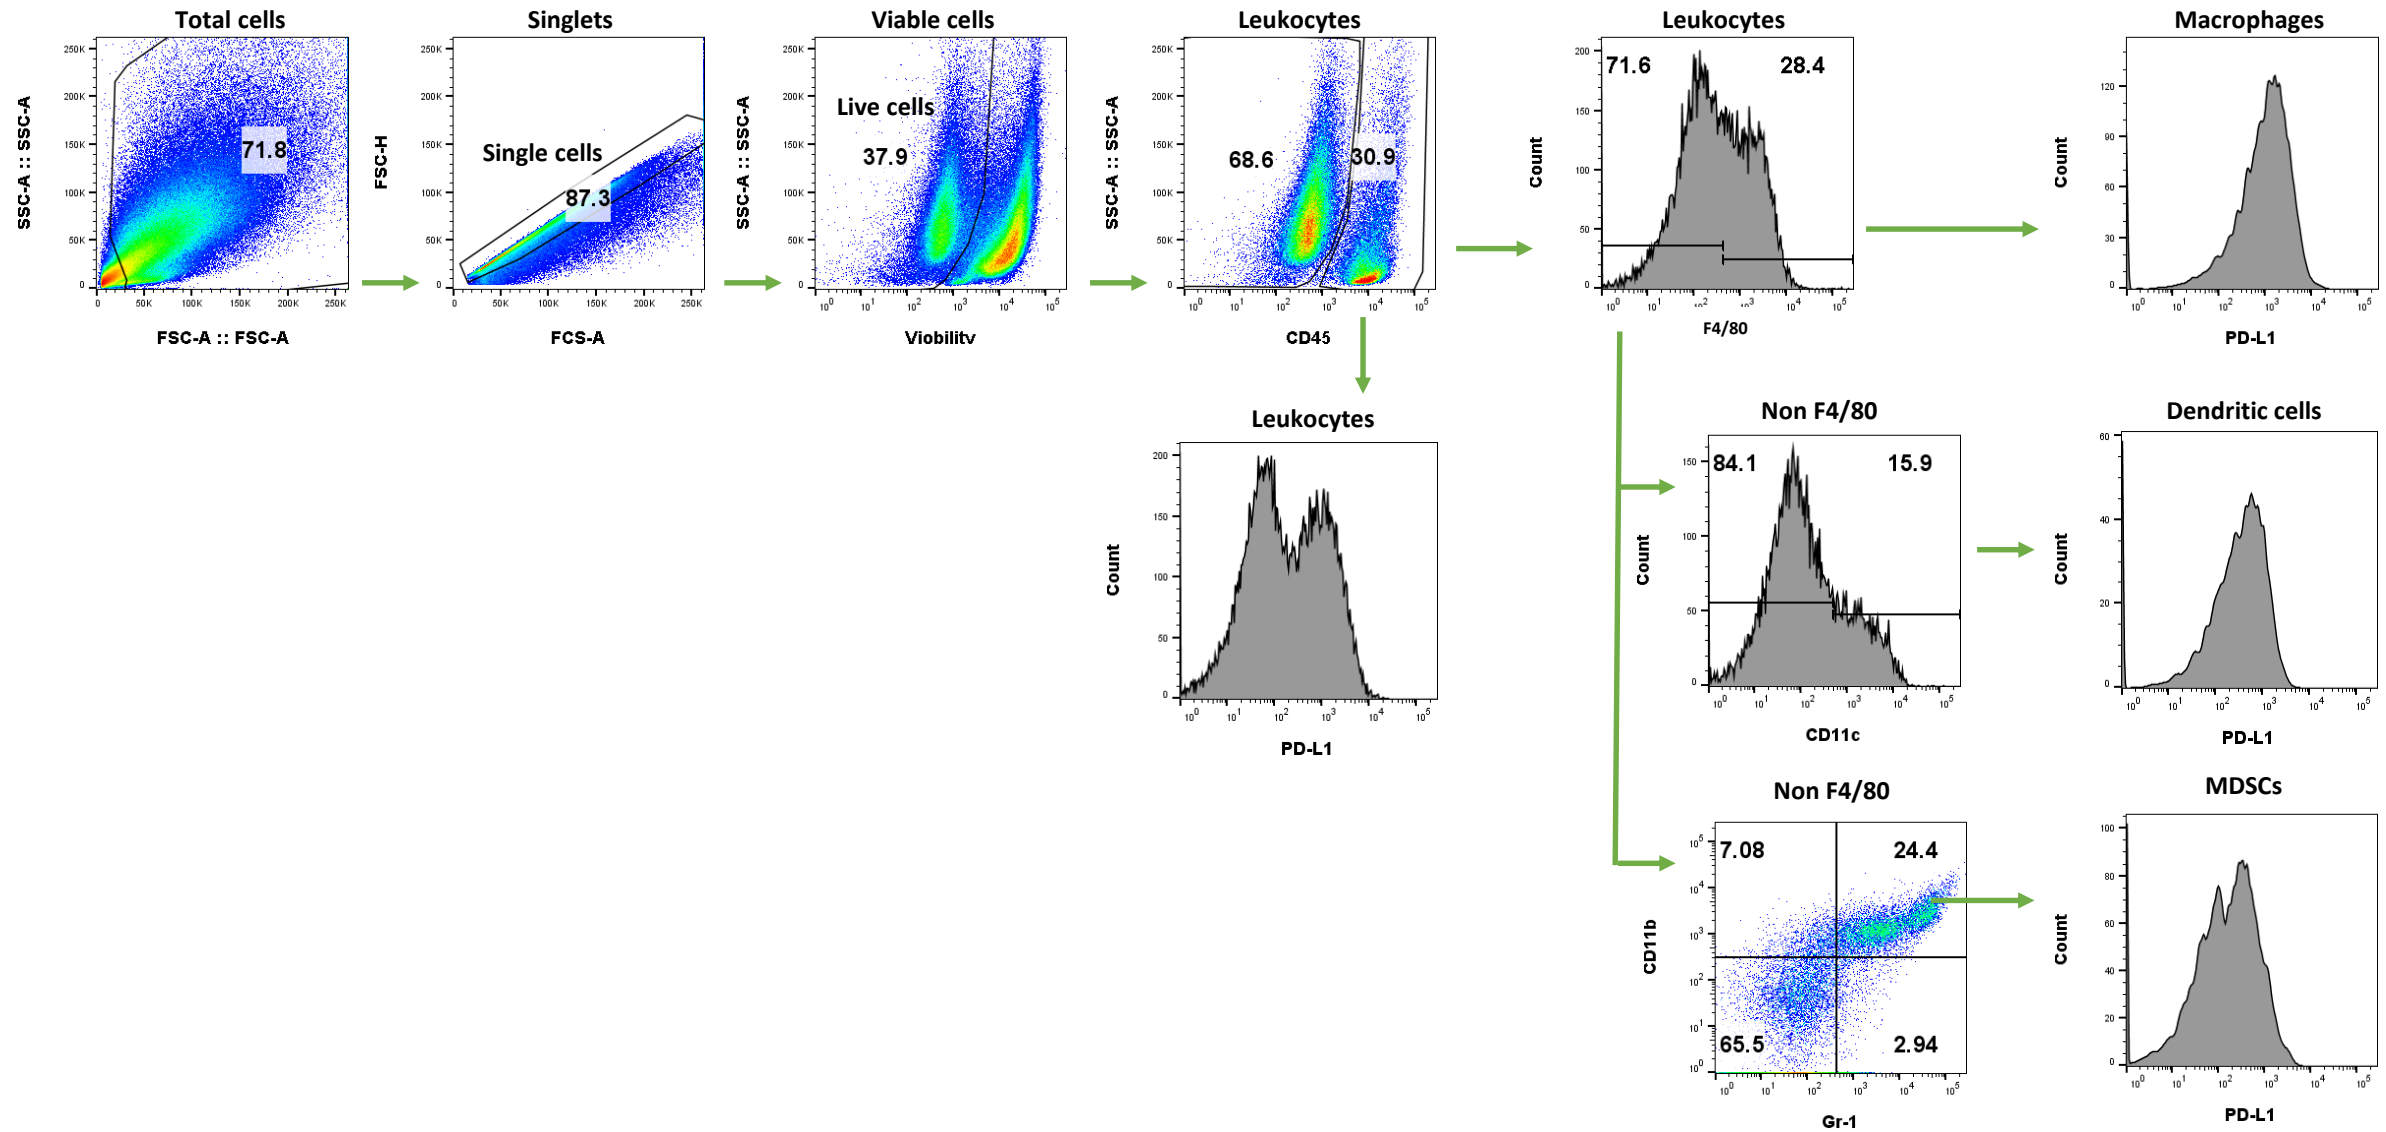

Flow cytometric gating strategy for discerning innate subsets. Leukocytes were gated based on CD45 expression. CD45<sup>+</sup> cells were further divided into macrophages (CD45<sup>+</sup>F4/80<sup>+</sup>CD11b<sup>+</sup>), dendritic cells (CD45<sup>+</sup>CD11c<sup>+</sup>), and myeloid-derived suppressor cells (MDSCs, CD45<sup>+</sup>Gr-1<sup>+</sup>CD11b<sup>+</sup>) subsets. All populations were further gated on the basis of PD-L1 expression.

**Figure S3**

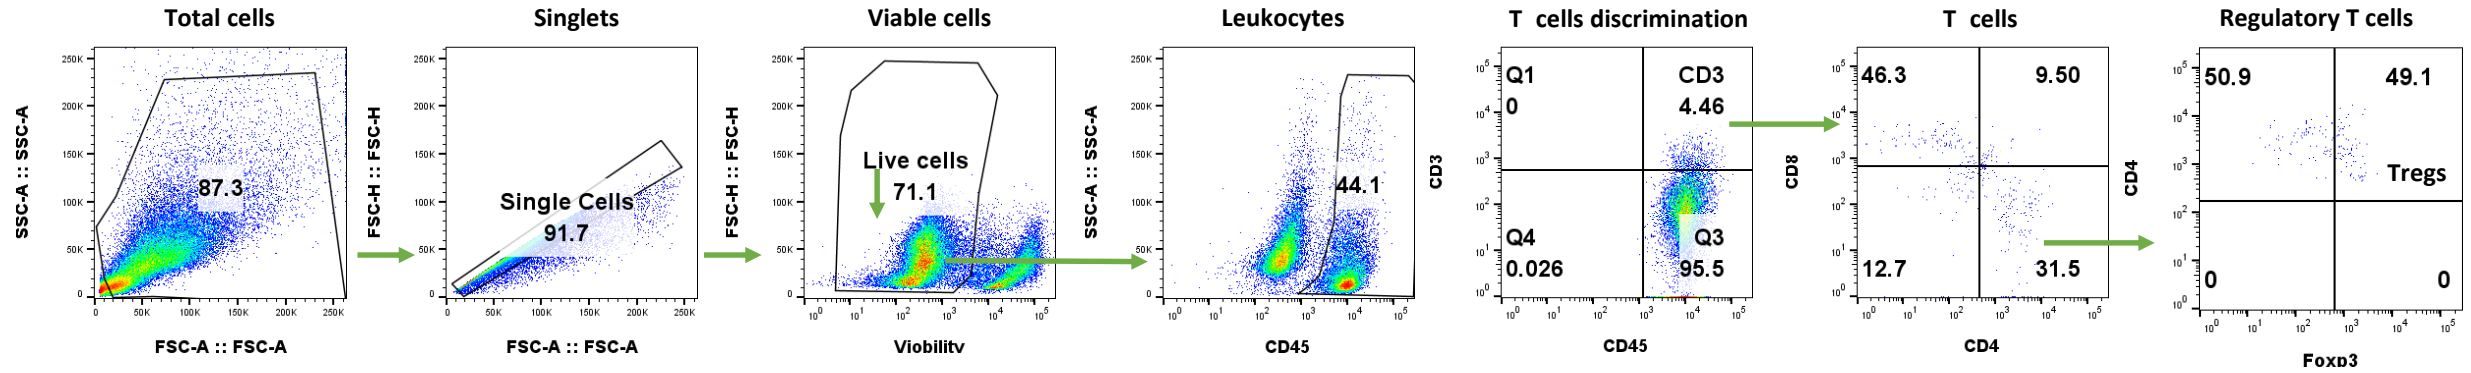

Flow cytometric gating strategy for discerning T cell subsets. T cells were gated based on CD45 and CD3 expression, and then further divided into cytotoxic T cells (CD45<sup>+</sup>CD3<sup>+</sup>CD8<sup>+</sup>), helper T cells (CD45<sup>+</sup>CD3<sup>+</sup>CD4<sup>+</sup>), and regulatory T cells (CD45<sup>+</sup>CD3<sup>+</sup>CD4<sup>+</sup>Foxp3<sup>+</sup>).

**Figure S4**

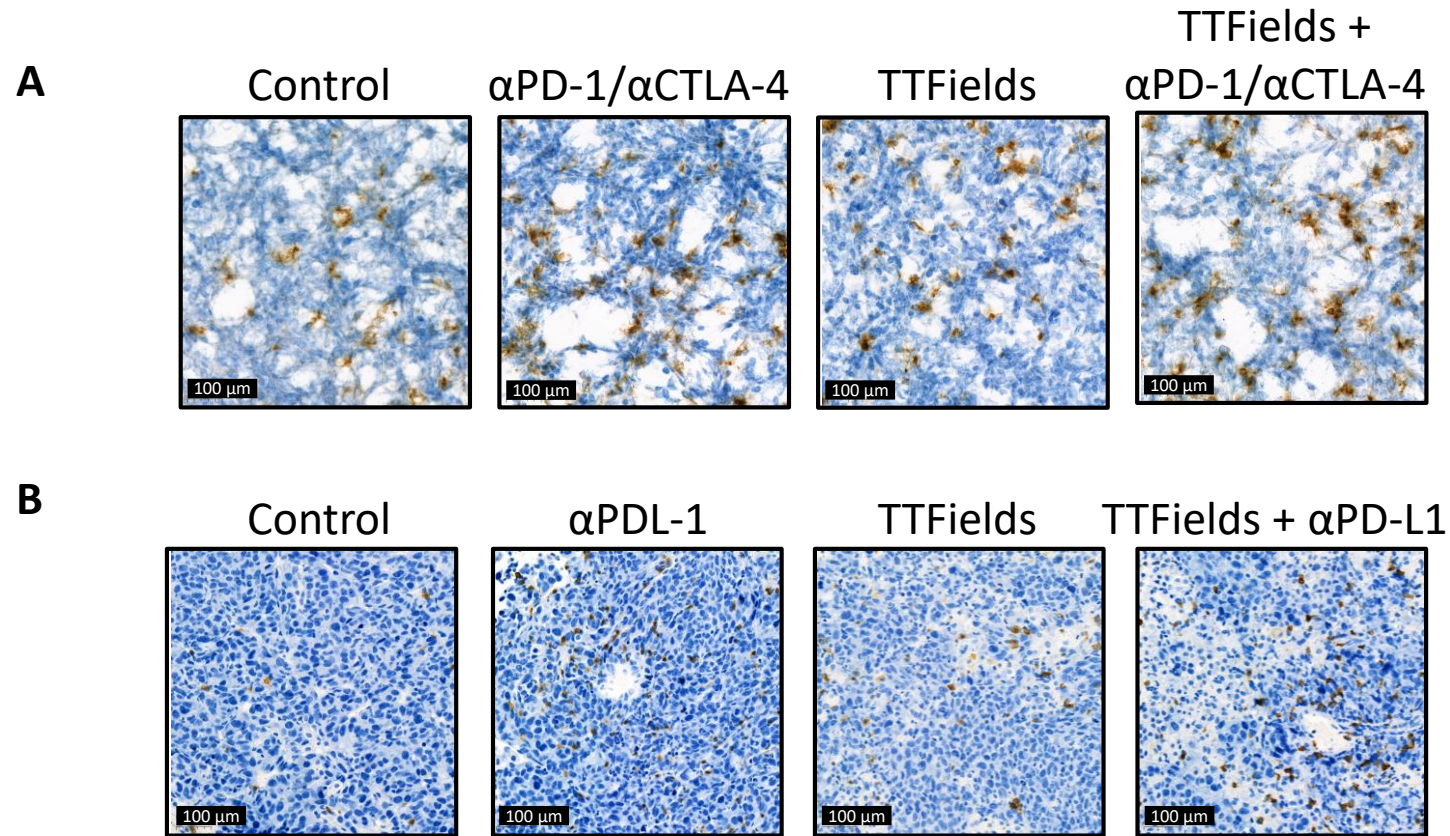

Immunohistochemical staining for CD8<sup>+</sup> cells (brown staining) in fresh-frozen tumor sections of mice from the anti-PD-1/anti-CTLA-4 ( $\alpha$ PD-1/ $\alpha$ CTLA-4) experiment **(A)** and in formalin-fixed tumor sections of mice from the anti-PD-L1 ( $\alpha$ PD-L1) experiment **(B)**. Counter-staining with hematoxylin (blue staining) was used for cell detection.

**Figure S5**

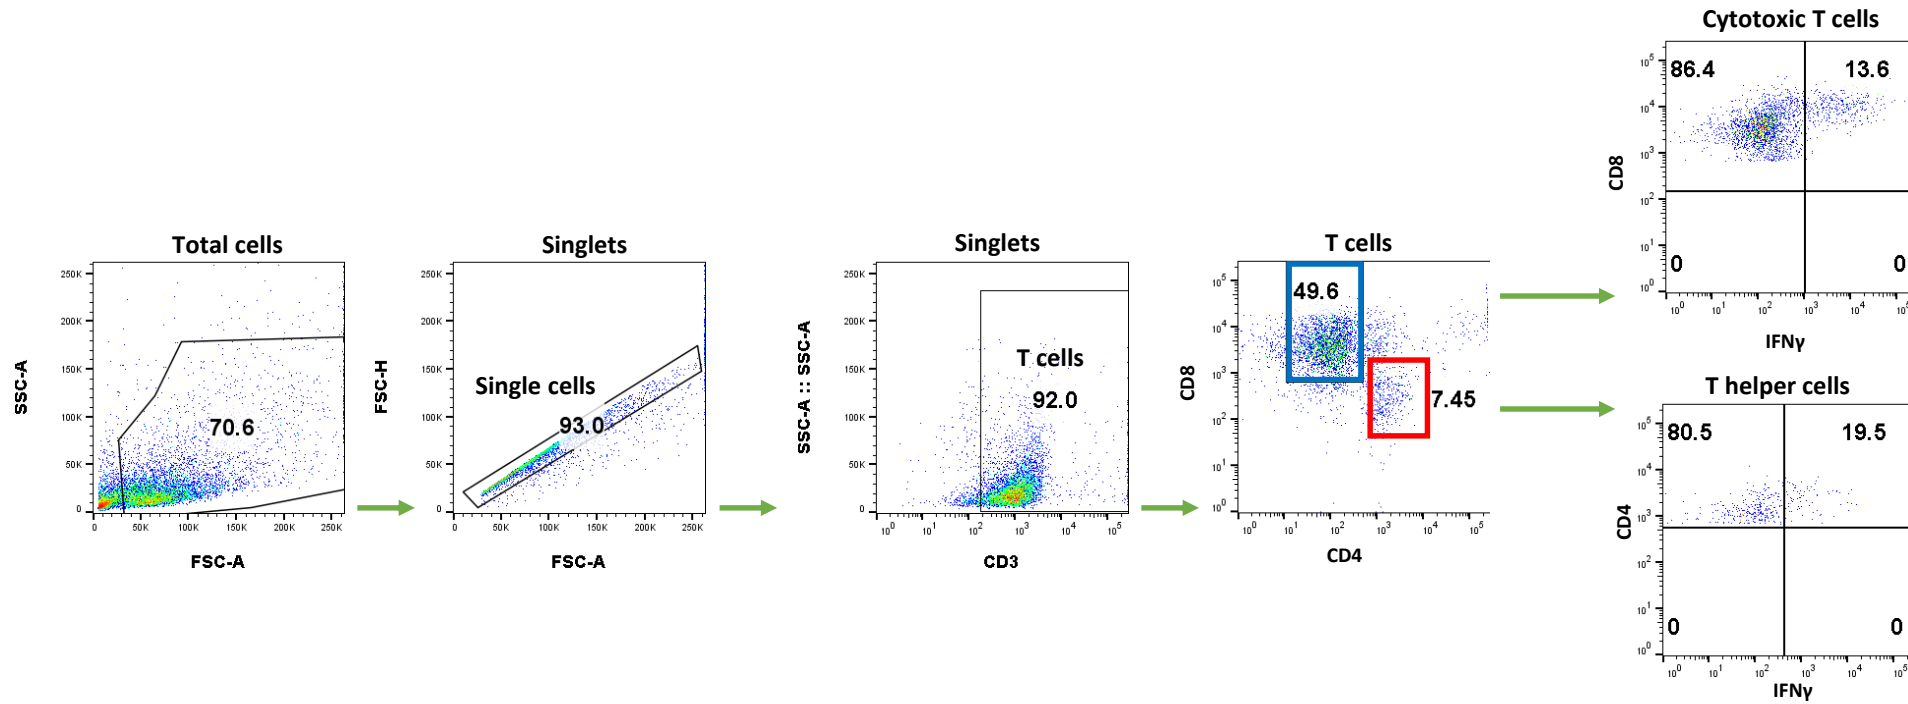

Flow cytometric gating strategy for detecting T cell IFN- $\gamma$  production. T cells were gated based on CD3 expression. CD3 $^+$  cells were further divided into cytotoxic (CD3 $^+$ CD8 $^+$ ) and helper (CD3 $^+$ CD4 $^+$ ) sets, from which IFN- $\gamma$  level were determined.

**Figure S6**

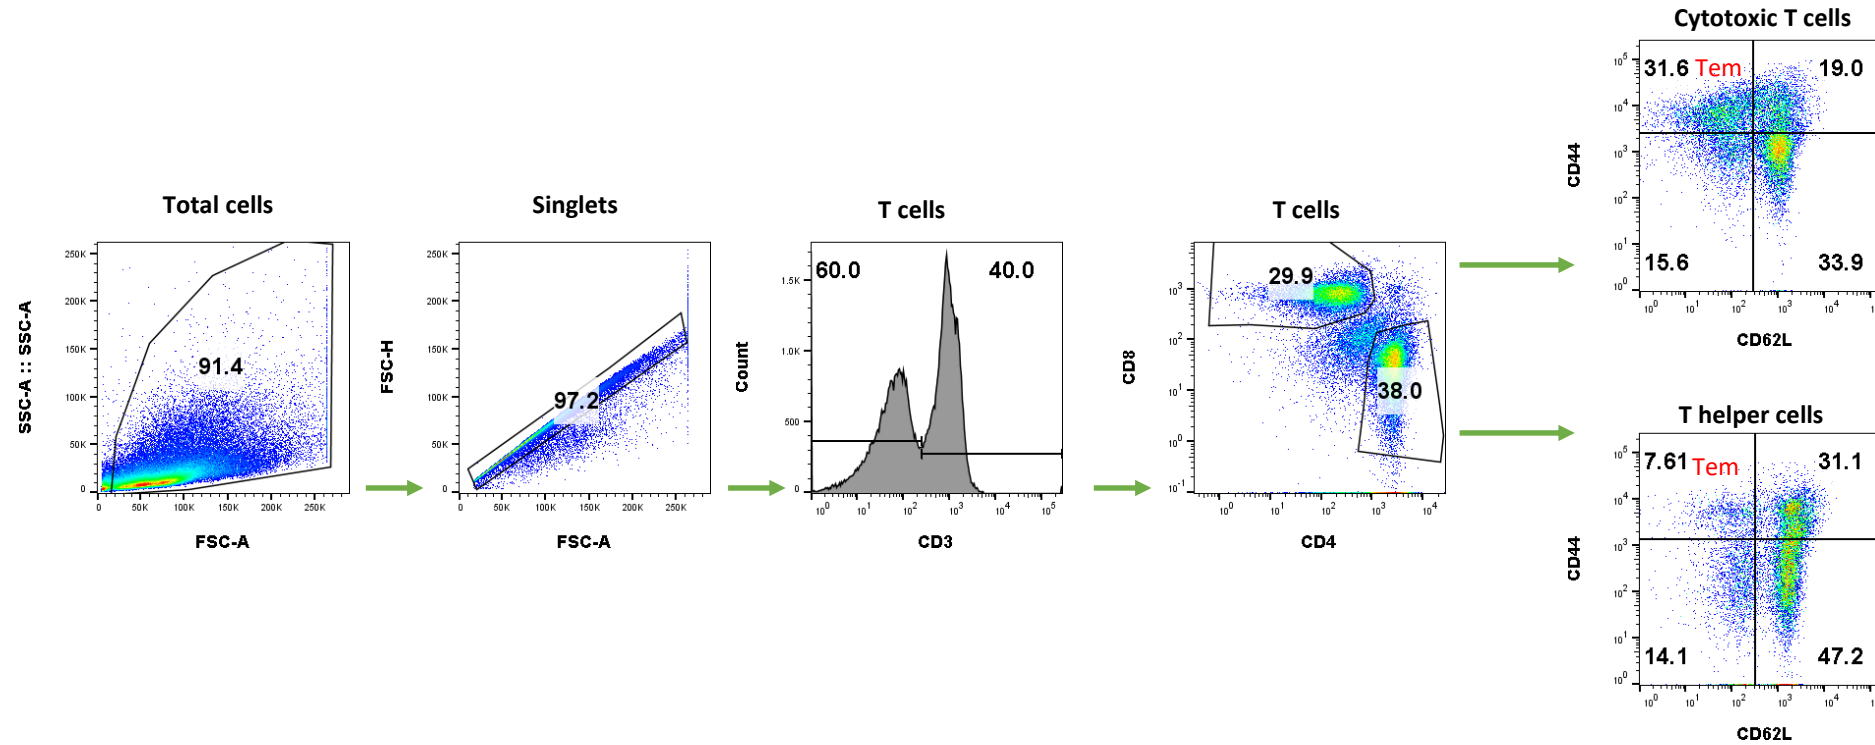

Flow cytometric gating strategy for discerning effector memory T cell subsets. T cells were gated based on CD3 expression. CD3<sup>+</sup> cells were further divided into cytotoxic (CD3<sup>+</sup>CD8<sup>+</sup>) and helper (CD3<sup>+</sup>CD4<sup>+</sup>) sets, from which effector memory cells were identified (CD44<sup>+</sup>CD62L<sup>-</sup>).
